# Supplementary material for: Mapping the sex determination locus in the hāpuku (Polyprion oxygeneios) using ddRAD sequencing
Source: PubMed Central journal article supplement (PMC4902995; doi:10.1186/s12864-016-2773-4), 2016-06-10

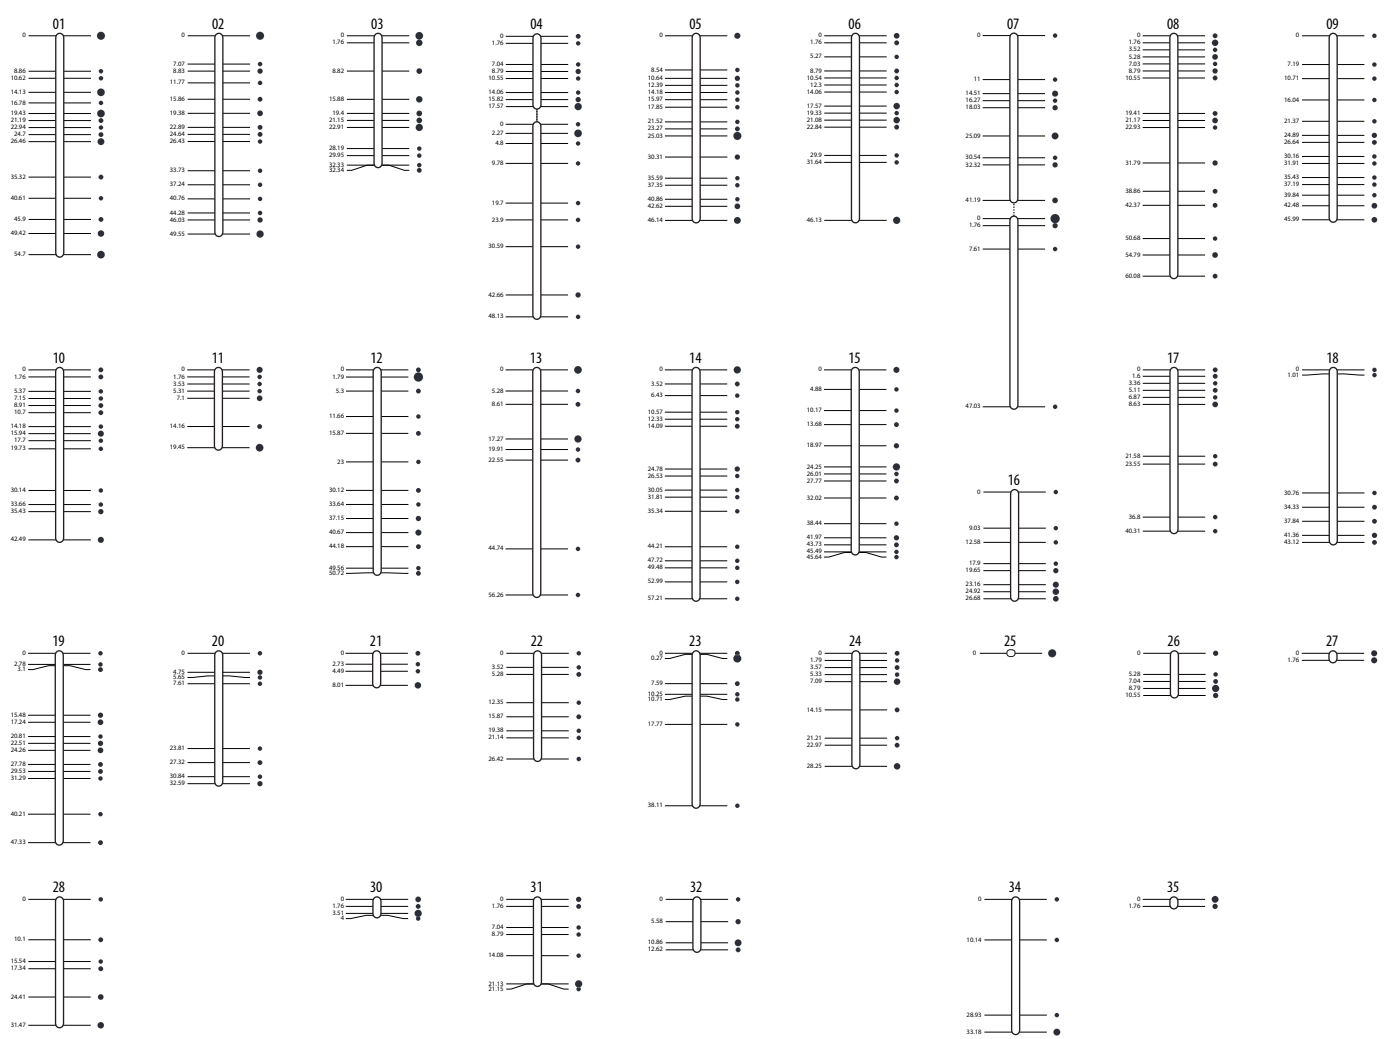

Supplement: 12864_2016_2773_MOESM5_ESM.pdf [file 12864_2016_2773_MOESM5_ESM.pdf]
